# Supplementary figures and images for: Influence of magnetic convection on separation efficiency in magnetophoretic microfluidic processes: a combined simulation and experimental study
Source: Royal Society of Chemistry journal article supplement (doi:10.1039/d4nr02225d), 2024-11-04

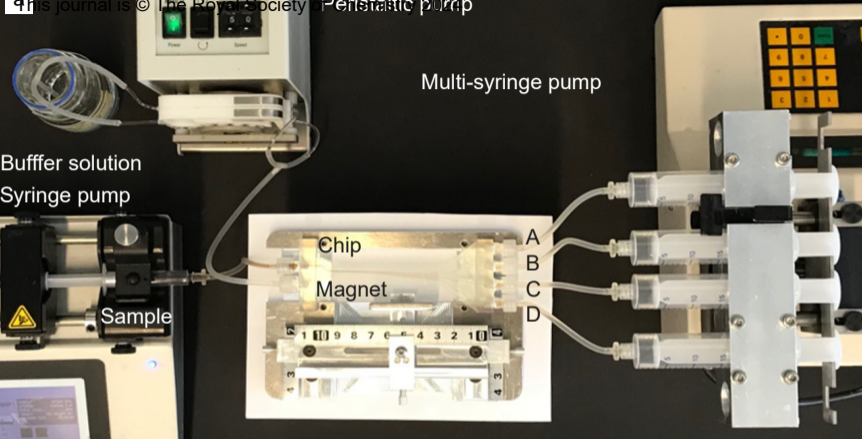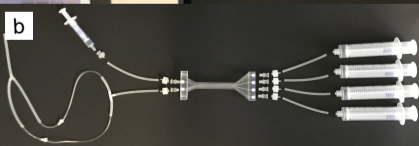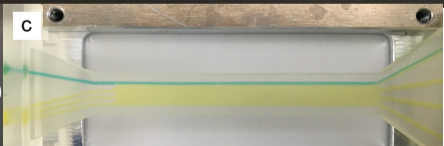

Supplement: d4nr02225d2.pdf [file d4nr02225d2.pdf]

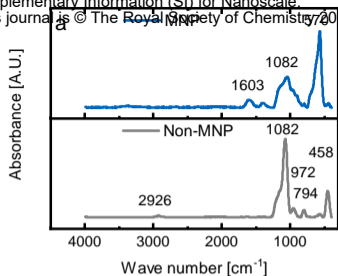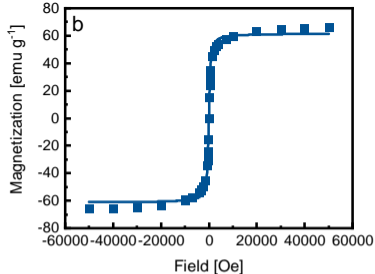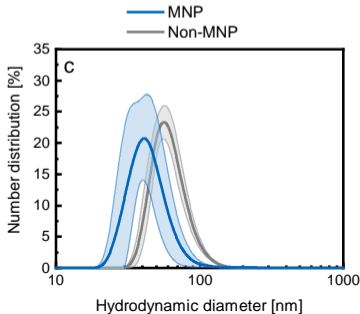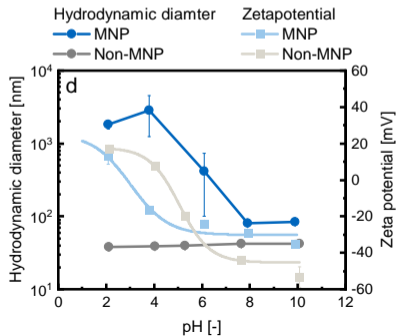

Supplement: d4nr02225d4.pdf [file d4nr02225d4.pdf]
